# Supplementary material for: Efficacy and safety of osteopathic manipulative treatment: an overview of systematic reviews
Source: HighWire-hosted journal article supplement (doi:10.1136/bmjopen-2021-053468), 2022-04-01
Supplement: bmjopen-2021-053468supp001_data_supplement.pdf [file bmjopen-2021-053468supp001_data_supplement.pdf]

**Appendix**

## Search Strategy: MEDLINE (PubMed)

01. osteopath\* AND medicine
02. osteopath\* AND treatment
03. osteopath\* AND manipulat\*
04. Manipulation, Osteopathic [Mesh]
05. Osteopathic Medicine [Mesh]
  
06. 01 OR 02 OR 03 OR 04 OR 05
  
07. meta-analysis
08. meta-analysis
09. metaanalysis
10. systematic review
11. review
12. Review Literature as Topic [Mesh]
13. Review" [Publication Type]
14. Meta-Analysis [Publication Type]
15. Meta-Analysis as Topic"[Mesh]
  
16. 07 OR 08 OR 09 OR 10 OR 11 OR 12 OR 13 OR 14 OR 15
  
17. 06 AND 16

**Supplemental Table 1.** Excluded systematic reviews.

| First author, year              | Title                                                                                                                                                       | Reason for exclusion                                                                                                                      |
|---------------------------------|-------------------------------------------------------------------------------------------------------------------------------------------------------------|-------------------------------------------------------------------------------------------------------------------------------------------|
| Schwerla, 1999 <sup>1</sup>     | [Evaluation and critical review published in the European literature on osteopathic studies in the clinical field and in the area of fundamental research]. | The SR included any type of study design.                                                                                                 |
| Spiegel, 2003 <sup>2</sup>      | Osteopathic manipulative medicine in the treatment of hypertension: An alternative, conventional approach.                                                  | Narrative review.                                                                                                                         |
| Gamber, 2005 <sup>3</sup>       | Cost-effective osteopathic manipulative medicine: a literature review of cost-effectiveness analyses for osteopathic manipulative treatment.                | Evaluation of OMT cost-effectiveness.                                                                                                     |
| Licciardone, 2005 <sup>4</sup>  | Osteopathic manipulative treatment for low back pain: a systematic review and meta-analysis of randomized controlled trials.                                | The SR included primary studies in which the intervention was not performed by osteopathic physicians or osteopaths.                      |
| Jäkel, 2011 <sup>5</sup>        | Therapeutic effects of cranial osteopathic manipulative medicine: a systematic review.                                                                      | The SR included primary studies in healthy volunteers.                                                                                    |
| Posadzki, 2011 <sup>6</sup>     | Osteopathy for musculoskeletal pain patients: A systematic review of randomized controlled trials.                                                          | The SR included primary studies in healthy volunteers and intervention was not performed by osteopathic physicians or osteopaths.         |
| Orrock, 2013 <sup>7</sup>       | Osteopathic intervention in chronic non-specific low back pain: a systematic review.                                                                        | Overlap: 2 out of 2 studies. This SR was update by Franke 2014 <sup>25</sup> .                                                            |
| Cerritelli, 2015 <sup>8</sup>   | Osteopathic manipulative treatment in neurological diseases: systematic review of the literature.                                                           | The SR included any type of study design.                                                                                                 |
| Cicchitti, 2015 <sup>9</sup>    | Chronic inflammatory disease and osteopathy: a systematic review.                                                                                           | The SR included study with an animal model and any type of study designs.                                                                 |
| Majchrzycki, 2015 <sup>10</sup> | Application of osteopathic manipulative technique in the treatment of back pain during pregnancy.                                                           | The SR included primary studies in which the intervention was not performed by osteopathic physicians or osteopaths.                      |
| Vasconcelos, 2015 <sup>11</sup> | Effect of osteopathic maneuvers in the treatment of asthma: review of literature.                                                                           | The SR included any type of study design, and the intervention was not performed by osteopathic physicians or osteopaths.                 |
| Guillard, 2016 <sup>12</sup>    | Reliability of diagnosis and clinical efficacy of cranial osteopathy: a systematic review.                                                                  | The SR included primary study in which the intervention was not performed by osteopathic physicians or osteopaths.                        |
| Kruger, 2016 <sup>13</sup>      | Osteopathic treatment of irritable bowel syndrome - A review.                                                                                               | Overlap: 4 out 4 studies. Most rigorous criteria were used in Muller' s SR <sup>32</sup> .                                                |
| Ruffini, 2016 <sup>14</sup>     | Osteopathic manipulative treatment in gynecology and obstetrics: A systematic review.                                                                       | The SR included any type of study designs.                                                                                                |
| Veloso, 2016 <sup>15</sup>      | Osteopathic Manipulation Treatment on postural balance: a systematic review.                                                                                | The SR included any type of study designs.                                                                                                |
| Raguckas, 2016 <sup>16</sup>    | Osteopathic considerations in obstructive pulmonary disease: A systematic review of the evidence.                                                           | The SR included any type of study designs.                                                                                                |
| Ahmad, 2017 <sup>17</sup>       | Current Clinical Status of Osteopathy: Study Based on Retrospective Evidences of Six Years, A Systemic Review.                                              | The SR included any type of study design, and the intervention was not performed by osteopathic physicians or osteopaths.                 |
| Do Vale, 2017 <sup>18</sup>     | Effectiveness of the osteopathic treatment in intestinal constipation: A systematic review.                                                                 | Clinical outcomes are not reported.                                                                                                       |
| Steel, 2017 <sup>19</sup>       | Osteopathic manipulative treatment: A systematic review and critical appraisal of comparative effectiveness and health economics research.                  | The SR included any study designs.                                                                                                        |
| Lanaro, 2017 <sup>20</sup>      | Osteopathic manipulative treatment showed reduction of length of stay and costs in preterm infants.                                                         | The SR included RCTs and controlled clinical trials.                                                                                      |
| Guillaud, 2018 <sup>21</sup>    | Reliability of diagnosis and clinical efficacy of visceral osteopathy: A systematic review.                                                                 | The SR included primary study in which the intervention was not performed by osteopathic physicians or osteopaths.                        |
| Potekhina, 2018 <sup>22</sup>   | Osteopathy is a new medical specialty. Assessment of clinical effectiveness of osteopathic manipulative therapy in various diseases.                        | The SR included any type of study design, and the intervention was not performed by osteopathic physicians or osteopaths.                 |
| Saracutu, 2018 <sup>23</sup>    | The effects of osteopathic treatment on psychosocial factors in people with persistent pain: A systematic review.                                           | The SR included primary studies in which the intervention was not performed by osteopathic physicians or osteopaths.                      |
| Sposato, 2018 <sup>24</sup>     | Osteopathic manipulative treatment in surgical care: short review of research publication in osteopathic Journals during the period 1990 to 2017.           | The SR included any study designs.                                                                                                        |
| Verhaeghe, 2018 <sup>25</sup>   | Osteopathic care for spinal complaints: A systematic literature review.                                                                                     | The SR included primary studies in which the intervention was not performed by osteopathic physicians or osteopaths.                      |
| Verhaeghe, 2018 <sup>26</sup>   | Osteopathic care for low back pain and neck pain. A cost-utility analysis.                                                                                  | Health economic evaluation of osteopathic care in low back pain and neck pain. Data about clinical outcomes were not completely reported. |

|                                |                                                                                                                   |                                                                                                                                                               |
|--------------------------------|-------------------------------------------------------------------------------------------------------------------|---------------------------------------------------------------------------------------------------------------------------------------------------------------|
| Whalen, 2018 <sup>27</sup>     | A Short Review of the Treatment of Headaches Using Osteopathic Manipulative Treatment.                            | The SR included any type of study design, and the intervention was not performed by osteopathic physicians or osteopaths.                                     |
| Rechberger, 2019 <sup>28</sup> | Effectiveness of an osteopathic treatment on the autonomic nervous system: a systematic review of the literature. | The SR included any type of study design, primary studies in healthy participants and intervention was not performed by osteopathic physicians or osteopaths. |
| Switters, 2019 <sup>29</sup>   | Is visceral manipulation beneficial for patients with low back pain? A systematic review of the literature.       | The SR included primary studies in which the intervention was not performed by osteopathic physicians or osteopaths.                                          |
| Buscemi, 2020 <sup>30</sup>    | Endocannabinoids release after osteopathic manipulative treatment. A brief review.                                | The SR included any type of study designs.                                                                                                                    |
| Santiago, 2020 <sup>31</sup>   | Instrumentation used to assess pain in osteopathic interventions: A critical literature review.                   | Clinical outcomes are not reported.                                                                                                                           |
| Kiepe, 2020 <sup>32</sup>      | Effects of osteopathic manipulative treatment on musicians: A systematic review.                                  | The SR included any type of study designs.                                                                                                                    |
| Baroni, 2021 <sup>33</sup>     | Osteopathic manipulative treatment and the Spanish flu: a historical literature review.                           | Historical review evaluating which OMT technique were administered in patients during the 1918 Spanish flu pandemic.                                          |
| Tramontano, 2021 <sup>34</sup> | Vertigo and balance disorders- The role of osteopathic manipulative treatment: A systematic review.               | The SR included any type of study designs and primary study in healthy participants.                                                                          |
| De Marsh, 2021 <sup>35</sup>   | Pediatric osteopathic manipulative medicine: A scoping review.                                                    | The SR included any type of study designs.                                                                                                                    |

OMT: osteopathic manipulative treatment, RCTs: randomized controlled trials, SR: systematic review.

## References

- Schwerla F, Hass-Degg K, Schwerla B. [Evaluation and critical review published in the European literature on osteopathic studies in the clinical field and in the area of fundamental research]. *Forsch Komplementarmed*. 1999; 6 (6):302-10. doi:10.1159/000021285.
- Spiegel AJ, Capobianco JD, Kruger A, et al. Osteopathic manipulative medicine in the treatment of hypertension: an alternative, conventional approach. *Heart Dis*. 2003;5:272-278. doi:10.1097/01.hdx.0000080718.70719.88.
- Gamber R, Holland S, Russo DP, et al. Cost-effective osteopathic manipulative medicine: a literature review of cost-effectiveness analyses for osteopathic manipulative treatment. *J Am Osteopath Assoc*. 2005;105:357-367.
- Licciardone JC, Brimhall AK, King LN. Osteopathic manipulative treatment for low back pain: a systematic review and meta-analysis of randomized controlled trials. *BMC Musculoskelet Disord*. 2005;6:43. doi:10.1186/1471-2474-6-43.
- Jäkel A, von Hauenschild P, Jakel A, et al. Therapeutic effects of cranial osteopathic manipulative medicine: a systematic review. *J Am Osteopath Assoc*. 2011;111:685-693.
- Posadzki P, Ernst E. Osteopathy for musculoskeletal pain patients: a systematic review of randomized controlled trials. *Clin Rheumatol*. 2011;30:285-291. doi:10.1007/s10067-010-1600-6.
- Orrock PJ, Myers SP. Osteopathic intervention in chronic non-specific low back pain: a systematic review. *BMC Musculoskelet Disord*. 2013;14:129. doi:10.1186/1471-2474-14-129.
- Cerritelli F, Ruffini N, Lacorte E, et al. Osteopathic manipulative treatment in neurological diseases: Systematic review of the literature. *J Neurol Sci*. 2016;369:333-341. doi:10.1016/j.jns.2016.08.062.
- Cicchiti L, Martelli M, Cerritelli F. Chronic inflammatory disease and osteopathy: A systematic review. *PLoS One*. 2015;10:e0121327. doi:10.1371/journal.pone.0121327.
- Majchrzycki M, Wolski H, Seremak-Mrozikiewicz A, et al. Application of osteopathic manipulative technique in the treatment of back pain during pregnancy. *Polish Gynaecol*. 2015;86:224-228. doi:10.17772/gp/2066.
- Vasconcelos Lago RM, da Silva Filho MAF, Nery dos Santos AC. Effect of osteopathic maneuvers in the treatment of asthma: review of literature. *Man Ther Posturology Rehabil J*. 2015;13:1-5. doi:10.17784/mtprehabJournal.2015.13.262.

12. Guillaud A, Darbois N, Monvoisin R, et al. Reliability of diagnosis and clinical efficacy of cranial osteopathy: A systematic review. *PLoS One*. 2016;11:e0167823. doi:10.1371/journal.pone.0167823.
13. Kruger S. Osteopathic treatment of irritable bowel syndrome - A review. *Osteopathische Medizin*. 2016;17(4):22-26. doi:10.1016/S1615-9071(16)30083-1.
14. Ruffini N, D'Alessandro G, Cardinali L, et al. Osteopathic manipulative treatment in gynecology and obstetrics: A systematic review. *Complement Ther Med*. 2016;26:72-78. doi:10.1016/j.ctim.2016.03.005.
15. Fantinel Veloso C, Ferreira da Silveira A, Vargas Garcia M, et al. Osteopathic Manipulation Treatment on postural balance: a systematic review. *Man Ther Posturology Rehabil J*. 2016;14:1-4. doi:10.17784/mtprehabjournal.2016.14.352.
16. Raguckas C, Ference J, Gross GA. Osteopathic considerations in obstructive pulmonary disease: A systematic review of the evidence. *Osteopath Fam Physician*. 2016;8:28-40.
17. Ahmad R. Current Clinical Status of Osteopathy: Study Based on Retrospective Evidences of Six Years, A Systemic Review. *Annual Research and Review in Biology*. 2017;20 (1): ARRB 37675. doi: 10.9734/ARRB/2017/37675.
18. Do Vale JR, Borges De Carvalho HF, Ângelo Andrade VL, et al. Effectiveness of the osteopathic treatment in intestinal constipation: A systematic review. *GED - Gastroenterologia Endosc Dig*. 2017;36:68-76.
19. Steel A, Sundberg T, Reid R, et al. Osteopathic manipulative treatment: A systematic review and critical appraisal of comparative effectiveness and health economics research. *Musculoskelet Sci Pract*. 2017;27:165-175. doi:10.1016/j.math.2016.10.067.
20. Lanaro D, Ruffini N, Manzotti A, et al. Osteopathic manipulative treatment showed reduction of length of stay and costs in preterm infants. *Medicine (Baltimore)*. 2017;96:e6408. doi:10.1097/MD.0000000000006408.
21. Guillaud A, Darbois N, Monvoisin R, et al. Reliability of diagnosis and clinical efficacy of visceral osteopathy: A systematic review. *BMC Complement Altern Med*. 2018;18:65. doi:10.1186/s12906-018-2098-8.
22. Potekhina YP, Tregubova ES, Mokhov DE. Osteopathy is a new medical specialty. assessment of clinical effectiveness of osteopathic manipulative therapy in various diseases. *Medical News of North Caucasus*. 2018;13(3):560-565. doi: 10.14300/mnnc.2018.13105.
23. Saracutu M, Rance J, Davies H, et al. The effects of osteopathic treatment on psychosocial factors in people with persistent pain: A systematic review. *Int J Osteopath Med*. 2018;27:23-33. doi:10.1016/j.ijosm.2017.10.005.
24. Sposato NS, Bjersa K. Osteopathic Manipulative Treatment in Surgical Care: Short Review of Research Publications in Osteopathic Journals During the Period 1990 to 2017. *J evidence-based Integr Med*. 2018;23:1-8. doi:10.1177/2515690X18767671.
25. Verhaeghe N, Schepers J, van Dun P, et al. Osteopathic care for spinal complaints: A systematic literature review. *PLoS One*. 2018;13:e0206284. doi:10.1371/journal.pone.0206284.
26. Verhaeghe N, Schepers J, van Dun P, et al. Osteopathic care for low back pain and neck pain: A cost-utility analysis. *Complement Ther Med*. 2018;40:207-213. doi:10.1016/j.ctim.2018.06.001.
27. Whalen J, Yao S, Leder A. A Short Review of the Treatment of Headaches Using Osteopathic Manipulative Treatment. *Curr Pain Headache Rep*. 2018;22:82. doi:10.1007/s11916-018-0736-y.
28. Jäkel A, von Hauenschild P. Therapeutic effects of cranial osteopathic manipulative medicine: a systematic review. *J Am Osteopath Assoc*. 2011;111:685-693.

29. Switters JM, Podar S, Perraton L, et al. Is visceral manipulation beneficial for patients with low back pain? A systematic review of the literature. *Int J Osteopath Med.* 2019;33:16-23. doi:10.1016/j.ijosm.2019.09.002.
30. Buscemi A, Martino S, Scirè Campisi S, et al. Endocannabinoids release after Osteopathic Manipulative Treatment. A brief review. *J Complement Integr Med.* Published online 2020. doi:10.1515/jcim-2020-0013.
31. Santiago RJ, Esteves J, Baptista JS, et al. Instrumentation used to assess pain in osteopathic interventions: A critical literature review. *Int J Osteopath Med.* 2020;37:25-33. doi:10.1016/j.ijosm.2020.05.007.
32. Kiepe M-S, Fernholz I, Schmidt T, et al. Effects of osteopathic manipulative treatment on musicians: A systematic review. *Med Probl Perform Art.* 2020;35:110-115. doi:10.21091/mppa.2020.2017.
33. Baroni F, Mancini D, Tuscano SC, et al. Osteopathic manipulative treatment and the Spanish flu: a historical literature review. *J Am Osteopath Assoc.* 2021;121:181-190. doi:10.1515/jom-2020-0112.
34. Tramontano M, Consorti G, Morone G, et al. Vertigo and Balance Disorders-The Role of Osteopathic Manipulative Treatment: A Systematic Review. *Complement Med Res.* Published online 2021. doi:10.1159/000512673.
35. DeMarsh S, Huntzinger A, Gehred A, et al. Pediatric osteopathic manipulative medicine: A scoping review. *Pediatrics.* 2021;147:1-16. doi:10.1542/peds.2020-016162.

**Supplemental Table 2.** Summary of identified systematic reviews with overlapping.

| Total SRs (n=9)                                           | Total | overlapping | Total |
|-----------------------------------------------------------|-------|-------------|-------|
| Total trials                                              | 71    | 14          | 57    |
| Total participants                                        | 5577  | 1837        | 3740  |
| <b>Musculoskeletal conditions (6 SRs)<sup>24-29</sup></b> |       |             |       |
| Total trials                                              | 44    | 14          | 30    |
| Total participants                                        | 4251  | 1837        | 2414  |
| Trials low back pain                                      | 34    | 12          | 22    |
| Participants low back pain                                | 3369  | 1316        | 2053  |
| Trials neck pain                                          | 3     | 0           | 3     |
| Participants neck pain                                    | 123   | 0           | 123   |
| Trials chronic non-cancer pain                            | 7     | 2           | 5     |
| Participants chronic non-cancer pain                      | 759   | 521         | 238   |
| <b>Paediatric conditions (1 SR)<sup>30</sup></b>          |       |             |       |
| Trials pediatrics conditions                              | 17    | 0           | 17    |
| Participants pediatric conditions                         | 887   | 0           | 887   |
| <b>Neurological conditions (1 SR)<sup>31</sup></b>        |       |             |       |
| Trials primary headache                                   | 5     | 0           | 5     |
| Participants primary headache                             | 235   | 0           | 235   |
| <b>Visceral conditions (1 SR)<sup>32</sup></b>            |       |             |       |
| Trials irritable bowel syndrome                           | 5     | 0           | 5     |
| Participants irritable bowel syndrome                     | 204   | 0           | 204   |

SR: systematic review.

**Supplemental Table 3.** Identified SRs with studies overlapping.

| Primary studies                                                                                                                                          | Participants   | Primary studies  | Participants  | Primary studies  | Participants  | Primary studies  | Participants  | Primary studies  | Participants  |
|----------------------------------------------------------------------------------------------------------------------------------------------------------|----------------|------------------|---------------|------------------|---------------|------------------|---------------|------------------|---------------|
| Chown 2008                                                                                                                                               | 71             |                  |               | Chown 2008       | 131*          | Albers 2018      | 48            | Rohrich 2014     | 35            |
| Gibson 1985                                                                                                                                              | 97             |                  |               |                  |               | Cuccia 2010      | 50            | Beltz 2014       | 54            |
| Licciardone 2003                                                                                                                                         | 71             | Licciardone 2003 | 71            | Licciardone 2003 | 98**          | Licciardone 2003 | 66            | Schwerla 2015    | 80            |
| Licciardone 2010                                                                                                                                         | 144            | Licciardone 2010 | 144           |                  |               |                  |               | Licciardone 2010 | 144           |
| Licciardone 2013                                                                                                                                         | 455            | Cleary 1994      | 12            | Licciardone 2013 | 455           | Licciardone 2013 | 455           | Hensel 2015      | 400           |
| Mandara 2008                                                                                                                                             | 94             | Burton 2000      | 30            | Mandara 2008     | 94            | Papa 2012        | 72            |                  |               |
| Peters 2006                                                                                                                                              | 57             |                  |               |                  |               | Schwerla 2008    | 37            | Peters 2006      | 57            |
| Grundemann 2013                                                                                                                                          | 41             |                  |               |                  |               | Stepnik 2018     | 31            | Gundemann 2013   | 41            |
| Recknagle 2007                                                                                                                                           | 39             |                  |               | De Oliveira 2019 | 38            |                  |               | Recknagle 2007   | 39            |
| Vismara 2012                                                                                                                                             | 21             | Vismara 2012     | 21            | Vismara 2012     | 21            |                  |               |                  |               |
| Anderson 1999                                                                                                                                            | 155            |                  |               |                  |               |                  |               |                  |               |
| Adorján - Schaumann 1999                                                                                                                                 | 57             |                  |               |                  |               |                  |               |                  |               |
| Heinze 2006                                                                                                                                              | 60             |                  |               |                  |               |                  |               |                  |               |
| Cruser 2012                                                                                                                                              | 60             |                  |               |                  |               |                  |               |                  |               |
| Schwerla 2012                                                                                                                                            | 80             |                  |               |                  |               |                  |               |                  |               |
| <b>Trials 15</b>                                                                                                                                         | <b>TP 1502</b> | <b>Trials 5</b>  | <b>TP 278</b> | <b>Trials 6</b>  | <b>TP 739</b> | <b>Trials 7</b>  | <b>TP 759</b> | <b>Trials 8</b>  | <b>TP 850</b> |
| TP, Total participants. *OMT group counted twice and considered exercise group even if drop-out are >40%, **participants at 6 months, OMT counted twice. |                |                  |               |                  |               |                  |               |                  |               |

| <b>Supplemental Table 4. Traffic light and overall traffic light evidence for each condition.</b>                                                                                                                                                                                                                                                                                                                                                                                                                                                                                                                                                                                                                                                                                                                                                                                                                                                                                                                                                                                                                                                                                                                                                                                                                                                                                                                                                                                                                                                                                                                                                                                                                               |                                 |          |             |                        |                                                    |                                  |
|---------------------------------------------------------------------------------------------------------------------------------------------------------------------------------------------------------------------------------------------------------------------------------------------------------------------------------------------------------------------------------------------------------------------------------------------------------------------------------------------------------------------------------------------------------------------------------------------------------------------------------------------------------------------------------------------------------------------------------------------------------------------------------------------------------------------------------------------------------------------------------------------------------------------------------------------------------------------------------------------------------------------------------------------------------------------------------------------------------------------------------------------------------------------------------------------------------------------------------------------------------------------------------------------------------------------------------------------------------------------------------------------------------------------------------------------------------------------------------------------------------------------------------------------------------------------------------------------------------------------------------------------------------------------------------------------------------------------------------|---------------------------------|----------|-------------|------------------------|----------------------------------------------------|----------------------------------|
| MUSCULOSCHELETAL CONDITIONS                                                                                                                                                                                                                                                                                                                                                                                                                                                                                                                                                                                                                                                                                                                                                                                                                                                                                                                                                                                                                                                                                                                                                                                                                                                                                                                                                                                                                                                                                                                                                                                                                                                                                                     | First author, year              | GRADE    | Effect size | Traffic light evidence | Downgrade                                          | Overall traffic light evidence § |
| <b>1. ANSLBP/CNSLBP §</b>                                                                                                                                                                                                                                                                                                                                                                                                                                                                                                                                                                                                                                                                                                                                                                                                                                                                                                                                                                                                                                                                                                                                                                                                                                                                                                                                                                                                                                                                                                                                                                                                                                                                                                       |                                 |          |             |                        |                                                    |                                  |
| Pain                                                                                                                                                                                                                                                                                                                                                                                                                                                                                                                                                                                                                                                                                                                                                                                                                                                                                                                                                                                                                                                                                                                                                                                                                                                                                                                                                                                                                                                                                                                                                                                                                                                                                                                            | Franke, 2014 <sup>25</sup>      | moderate | medium      |                        | Least favourable assessment from new RoB           |                                  |
|                                                                                                                                                                                                                                                                                                                                                                                                                                                                                                                                                                                                                                                                                                                                                                                                                                                                                                                                                                                                                                                                                                                                                                                                                                                                                                                                                                                                                                                                                                                                                                                                                                                                                                                                 | Dal Farra, 2020 <sup>27</sup>   | low      | medium      |                        | Low GRADE                                          |                                  |
| Functional status                                                                                                                                                                                                                                                                                                                                                                                                                                                                                                                                                                                                                                                                                                                                                                                                                                                                                                                                                                                                                                                                                                                                                                                                                                                                                                                                                                                                                                                                                                                                                                                                                                                                                                               | Franke, 2014 <sup>25</sup>      | moderate | small       |                        | Least favourable assessment from new RoB           |                                  |
|                                                                                                                                                                                                                                                                                                                                                                                                                                                                                                                                                                                                                                                                                                                                                                                                                                                                                                                                                                                                                                                                                                                                                                                                                                                                                                                                                                                                                                                                                                                                                                                                                                                                                                                                 | Dal Farra, 2020 <sup>27</sup>   | low      | medium      |                        | Low GRADE                                          |                                  |
| <b>2. CNSLBP §</b>                                                                                                                                                                                                                                                                                                                                                                                                                                                                                                                                                                                                                                                                                                                                                                                                                                                                                                                                                                                                                                                                                                                                                                                                                                                                                                                                                                                                                                                                                                                                                                                                                                                                                                              |                                 |          |             |                        |                                                    |                                  |
| Pain                                                                                                                                                                                                                                                                                                                                                                                                                                                                                                                                                                                                                                                                                                                                                                                                                                                                                                                                                                                                                                                                                                                                                                                                                                                                                                                                                                                                                                                                                                                                                                                                                                                                                                                            | Franke, 2014 <sup>25</sup>      | moderate | small       |                        | Least favourable assessment from new RoB           |                                  |
|                                                                                                                                                                                                                                                                                                                                                                                                                                                                                                                                                                                                                                                                                                                                                                                                                                                                                                                                                                                                                                                                                                                                                                                                                                                                                                                                                                                                                                                                                                                                                                                                                                                                                                                                 | Dal Farra, 2020 <sup>27</sup>   | low      | medium      |                        | Low GRADE                                          |                                  |
| Functional status                                                                                                                                                                                                                                                                                                                                                                                                                                                                                                                                                                                                                                                                                                                                                                                                                                                                                                                                                                                                                                                                                                                                                                                                                                                                                                                                                                                                                                                                                                                                                                                                                                                                                                               | Franke, 2014 <sup>25</sup>      | high     | small       |                        | Least favourable assessment from new RoB           |                                  |
|                                                                                                                                                                                                                                                                                                                                                                                                                                                                                                                                                                                                                                                                                                                                                                                                                                                                                                                                                                                                                                                                                                                                                                                                                                                                                                                                                                                                                                                                                                                                                                                                                                                                                                                                 | Dal Farra, 2020 <sup>27</sup>   | low      | small       |                        | Low GRADE                                          |                                  |
| <b>3. NSLBP in Pregnancy §</b>                                                                                                                                                                                                                                                                                                                                                                                                                                                                                                                                                                                                                                                                                                                                                                                                                                                                                                                                                                                                                                                                                                                                                                                                                                                                                                                                                                                                                                                                                                                                                                                                                                                                                                  |                                 |          |             |                        |                                                    |                                  |
| Pain                                                                                                                                                                                                                                                                                                                                                                                                                                                                                                                                                                                                                                                                                                                                                                                                                                                                                                                                                                                                                                                                                                                                                                                                                                                                                                                                                                                                                                                                                                                                                                                                                                                                                                                            | Franke, 2014 <sup>25</sup>      | low      | medium      |                        | Low GRADE                                          |                                  |
|                                                                                                                                                                                                                                                                                                                                                                                                                                                                                                                                                                                                                                                                                                                                                                                                                                                                                                                                                                                                                                                                                                                                                                                                                                                                                                                                                                                                                                                                                                                                                                                                                                                                                                                                 | Franke, 2017 <sup>26</sup>      | moderate | medium      |                        | Least favourable assessment from new RoB           |                                  |
| Functional status                                                                                                                                                                                                                                                                                                                                                                                                                                                                                                                                                                                                                                                                                                                                                                                                                                                                                                                                                                                                                                                                                                                                                                                                                                                                                                                                                                                                                                                                                                                                                                                                                                                                                                               | Franke, 2014 <sup>25</sup>      | low      | medium      |                        | Low GRADE                                          |                                  |
|                                                                                                                                                                                                                                                                                                                                                                                                                                                                                                                                                                                                                                                                                                                                                                                                                                                                                                                                                                                                                                                                                                                                                                                                                                                                                                                                                                                                                                                                                                                                                                                                                                                                                                                                 | Franke, 2017 <sup>26</sup>      | moderate | small       |                        | Least favourable assessment from new RoB           |                                  |
| <b>4. NSLBP in PP</b>                                                                                                                                                                                                                                                                                                                                                                                                                                                                                                                                                                                                                                                                                                                                                                                                                                                                                                                                                                                                                                                                                                                                                                                                                                                                                                                                                                                                                                                                                                                                                                                                                                                                                                           |                                 |          |             |                        |                                                    |                                  |
| Pain                                                                                                                                                                                                                                                                                                                                                                                                                                                                                                                                                                                                                                                                                                                                                                                                                                                                                                                                                                                                                                                                                                                                                                                                                                                                                                                                                                                                                                                                                                                                                                                                                                                                                                                            | Franke, 2014 <sup>25</sup>      | moderate | large       |                        | Least favourable assessment from new RoB           |                                  |
|                                                                                                                                                                                                                                                                                                                                                                                                                                                                                                                                                                                                                                                                                                                                                                                                                                                                                                                                                                                                                                                                                                                                                                                                                                                                                                                                                                                                                                                                                                                                                                                                                                                                                                                                 | Franke, 2017 <sup>26</sup>      | low      | large       |                        | Low GRADE                                          |                                  |
| Functional status                                                                                                                                                                                                                                                                                                                                                                                                                                                                                                                                                                                                                                                                                                                                                                                                                                                                                                                                                                                                                                                                                                                                                                                                                                                                                                                                                                                                                                                                                                                                                                                                                                                                                                               | Franke, 2014 <sup>25</sup>      | moderate | small       |                        | Least favourable assessment from new RoB           |                                  |
|                                                                                                                                                                                                                                                                                                                                                                                                                                                                                                                                                                                                                                                                                                                                                                                                                                                                                                                                                                                                                                                                                                                                                                                                                                                                                                                                                                                                                                                                                                                                                                                                                                                                                                                                 | Franke, 2017 <sup>26</sup>      | low      | small       |                        | Low GRADE                                          |                                  |
| <b>5. LBP WITH SCIATICA</b>                                                                                                                                                                                                                                                                                                                                                                                                                                                                                                                                                                                                                                                                                                                                                                                                                                                                                                                                                                                                                                                                                                                                                                                                                                                                                                                                                                                                                                                                                                                                                                                                                                                                                                     |                                 |          |             |                        |                                                    |                                  |
| Pain                                                                                                                                                                                                                                                                                                                                                                                                                                                                                                                                                                                                                                                                                                                                                                                                                                                                                                                                                                                                                                                                                                                                                                                                                                                                                                                                                                                                                                                                                                                                                                                                                                                                                                                            | De Oliveira, 2013 <sup>24</sup> | NP       | NP          |                        | Critically low SR                                  |                                  |
| <b>6. LBP with MENOPAUSAL SYMPTOMS</b>                                                                                                                                                                                                                                                                                                                                                                                                                                                                                                                                                                                                                                                                                                                                                                                                                                                                                                                                                                                                                                                                                                                                                                                                                                                                                                                                                                                                                                                                                                                                                                                                                                                                                          |                                 |          |             |                        |                                                    |                                  |
| Pain                                                                                                                                                                                                                                                                                                                                                                                                                                                                                                                                                                                                                                                                                                                                                                                                                                                                                                                                                                                                                                                                                                                                                                                                                                                                                                                                                                                                                                                                                                                                                                                                                                                                                                                            | De Oliveira, 2013 <sup>24</sup> | NP       | NP          |                        | Critically low SR                                  |                                  |
| <b>7. CNSNP</b>                                                                                                                                                                                                                                                                                                                                                                                                                                                                                                                                                                                                                                                                                                                                                                                                                                                                                                                                                                                                                                                                                                                                                                                                                                                                                                                                                                                                                                                                                                                                                                                                                                                                                                                 |                                 |          |             |                        |                                                    |                                  |
| Pain                                                                                                                                                                                                                                                                                                                                                                                                                                                                                                                                                                                                                                                                                                                                                                                                                                                                                                                                                                                                                                                                                                                                                                                                                                                                                                                                                                                                                                                                                                                                                                                                                                                                                                                            | Franke, 2015 <sup>28</sup>      | moderate | medium      |                        | Least favourable assessment from new RoB           |                                  |
| Functional status                                                                                                                                                                                                                                                                                                                                                                                                                                                                                                                                                                                                                                                                                                                                                                                                                                                                                                                                                                                                                                                                                                                                                                                                                                                                                                                                                                                                                                                                                                                                                                                                                                                                                                               | Franke, 2015 <sup>28</sup>      | moderate | small       |                        | Least favourable assessment from new RoB           |                                  |
| <b>8. CNCP</b>                                                                                                                                                                                                                                                                                                                                                                                                                                                                                                                                                                                                                                                                                                                                                                                                                                                                                                                                                                                                                                                                                                                                                                                                                                                                                                                                                                                                                                                                                                                                                                                                                                                                                                                  |                                 |          |             |                        |                                                    |                                  |
| Pain                                                                                                                                                                                                                                                                                                                                                                                                                                                                                                                                                                                                                                                                                                                                                                                                                                                                                                                                                                                                                                                                                                                                                                                                                                                                                                                                                                                                                                                                                                                                                                                                                                                                                                                            | Rehman, 2020 <sup>29</sup>      | moderate | small       |                        | No judgement for imprecision                       |                                  |
| Disability                                                                                                                                                                                                                                                                                                                                                                                                                                                                                                                                                                                                                                                                                                                                                                                                                                                                                                                                                                                                                                                                                                                                                                                                                                                                                                                                                                                                                                                                                                                                                                                                                                                                                                                      | Rehman, 2020 <sup>29</sup>      | moderate | small       |                        | No judgement for imprecision                       |                                  |
| Quality of life                                                                                                                                                                                                                                                                                                                                                                                                                                                                                                                                                                                                                                                                                                                                                                                                                                                                                                                                                                                                                                                                                                                                                                                                                                                                                                                                                                                                                                                                                                                                                                                                                                                                                                                 | Rehman, 2020 <sup>29</sup>      | moderate | medium      |                        | No judgement for imprecision                       |                                  |
| <b>PAEDIATRIC CONDITIONS</b>                                                                                                                                                                                                                                                                                                                                                                                                                                                                                                                                                                                                                                                                                                                                                                                                                                                                                                                                                                                                                                                                                                                                                                                                                                                                                                                                                                                                                                                                                                                                                                                                                                                                                                    |                                 |          |             |                        |                                                    |                                  |
| Outcomes for different conditions *                                                                                                                                                                                                                                                                                                                                                                                                                                                                                                                                                                                                                                                                                                                                                                                                                                                                                                                                                                                                                                                                                                                                                                                                                                                                                                                                                                                                                                                                                                                                                                                                                                                                                             | Posadzky, 2013 <sup>30</sup>    | NP       | NP          |                        | High risk of bias and critically low quality of SR |                                  |
| <b>NEUROLOGICAL CONDITIONS</b>                                                                                                                                                                                                                                                                                                                                                                                                                                                                                                                                                                                                                                                                                                                                                                                                                                                                                                                                                                                                                                                                                                                                                                                                                                                                                                                                                                                                                                                                                                                                                                                                                                                                                                  |                                 |          |             |                        |                                                    |                                  |
| Outcomes for migraine and tension type headache**                                                                                                                                                                                                                                                                                                                                                                                                                                                                                                                                                                                                                                                                                                                                                                                                                                                                                                                                                                                                                                                                                                                                                                                                                                                                                                                                                                                                                                                                                                                                                                                                                                                                               | Cerritelli, 2017 <sup>31</sup>  | NP       | NP          |                        | High risk of bias and low quality of SR            |                                  |
| <b>VISCERAL CONDITION</b>                                                                                                                                                                                                                                                                                                                                                                                                                                                                                                                                                                                                                                                                                                                                                                                                                                                                                                                                                                                                                                                                                                                                                                                                                                                                                                                                                                                                                                                                                                                                                                                                                                                                                                       |                                 |          |             |                        |                                                    |                                  |
| Outcomes for IBS***                                                                                                                                                                                                                                                                                                                                                                                                                                                                                                                                                                                                                                                                                                                                                                                                                                                                                                                                                                                                                                                                                                                                                                                                                                                                                                                                                                                                                                                                                                                                                                                                                                                                                                             | Muller, 2014 <sup>32</sup>      | NP       | NP          |                        | High risk of bias and low quality of SR            |                                  |
| <p><b>Traffic light evidence:</b> Green light, MA indicated intervention effectiveness (Effect size any level). Downgrade for GRADE low (or GRADE moderate/high in which judgement for some domains was not performed by the authors or our use of the new RoB version was the least favorable assessment) or for a low/critically low quality of the SRs; Yellow light, MA was not performed, conflicting results from RCTs or only one RCT. Downgrade for high risk of bias (from SR authors or our assessment) or low/critically low quality of SR; Red light, MA indicated that the intervention was ineffective or less effective than comparator. § SR from De Oliveira was not considered as for this condition all RCTs were included in more recent SRs with MAs.</p> <p><b>Overall traffic light evidence:</b> Green light, high quality evidence from MA indicates intervention effectiveness; Yellow light, promising evidence suggests possible effectiveness, but more research would increase our confidence in the estimate of the effect; Red light, limited or inconclusive evidence.</p> <p>ANSLBP: acute non-specific low back pain, CNCP: chronic non-cancer pain, CNSLBP: chronic non-specific low back pain, CNSNP: chronic non-specific neck pain, IBS: irritable bowel syndrome, LBP: low back pain, MA: meta analysis, NP: not performed, NSLBP: non-specific low back pain, PP: postpartum, RCT: randomized controlled trial, RoB: risk of bias, SR: systematic review.</p> <p>*Different conditions were considered. It's not possible to evaluate the single outcome for each condition, **pain, work disability, headache frequency, quality of life, ***pain, constipation, quality of life.</p> |                                 |          |             |                        |                                                    |                                  |
